# Supplementary material for: Synthesis and characterization of triblock copolymer PLA-b-PBT-b-PLA and its effect on the crystallization of PLA
Source: Royal Society of Chemistry journal article supplement (doi:10.1039/c3ra42096e), 2013-01-01
Supplement: c3ra42096e.pdf [file c3ra42096e.pdf]

## Supporting Information

### Synthesis and characterization of triblock copolymer of PLA-*b*-PBT-*b*-PLA and its effect on crystallization of PLA

Jian Zhou<sup>a</sup>, Zhiqiang Jiang<sup>a,b</sup>, Zongbao Wang<sup>a</sup>, Jianqiang Zhang<sup>a,c</sup>, Jun Li<sup>d</sup>, Ya Li<sup>a</sup>,  
Junwu Zhang<sup>a</sup>, Peng Chen\*<sup>a,e</sup> and Qun Gu \*<sup>a</sup>

<sup>a</sup>Ningbo Key Laboratory of Polymer Materials, Ningbo Institute of Materials  
Technology and Engineering, Chinese Academy of Sciences, Ningbo, Zhejiang  
315201, PR China

<sup>b</sup>School of Chemistry, University of Edinburgh, West Mains Road, Edinburgh, EH9 3  
JJ, United Kingdom

<sup>c</sup>School of Petrochemical Technology, Lanzhou University of Technology, Lanzhou,  
730050, PR China.

<sup>d</sup> School of Chemical Engineering and Technology, Harbin Institute of Technology  
150001, PR China

<sup>e</sup> Key Laboratory of New Marine Materials and Application Technology, Ningbo  
Institute of Materials Technology and Engineering, Chinese Academy of Sciences

\* To whom correspondence should be addressed. E-mail: [pchen@nimte.ac.cn](mailto:pchen@nimte.ac.cn); Tel: +86-574-86685283; Fax: +86-574-86685186; [guqun@nimte.ac.cn](mailto:guqun@nimte.ac.cn); Tel: +86-574-86685183; Fax: +86-574-86685186

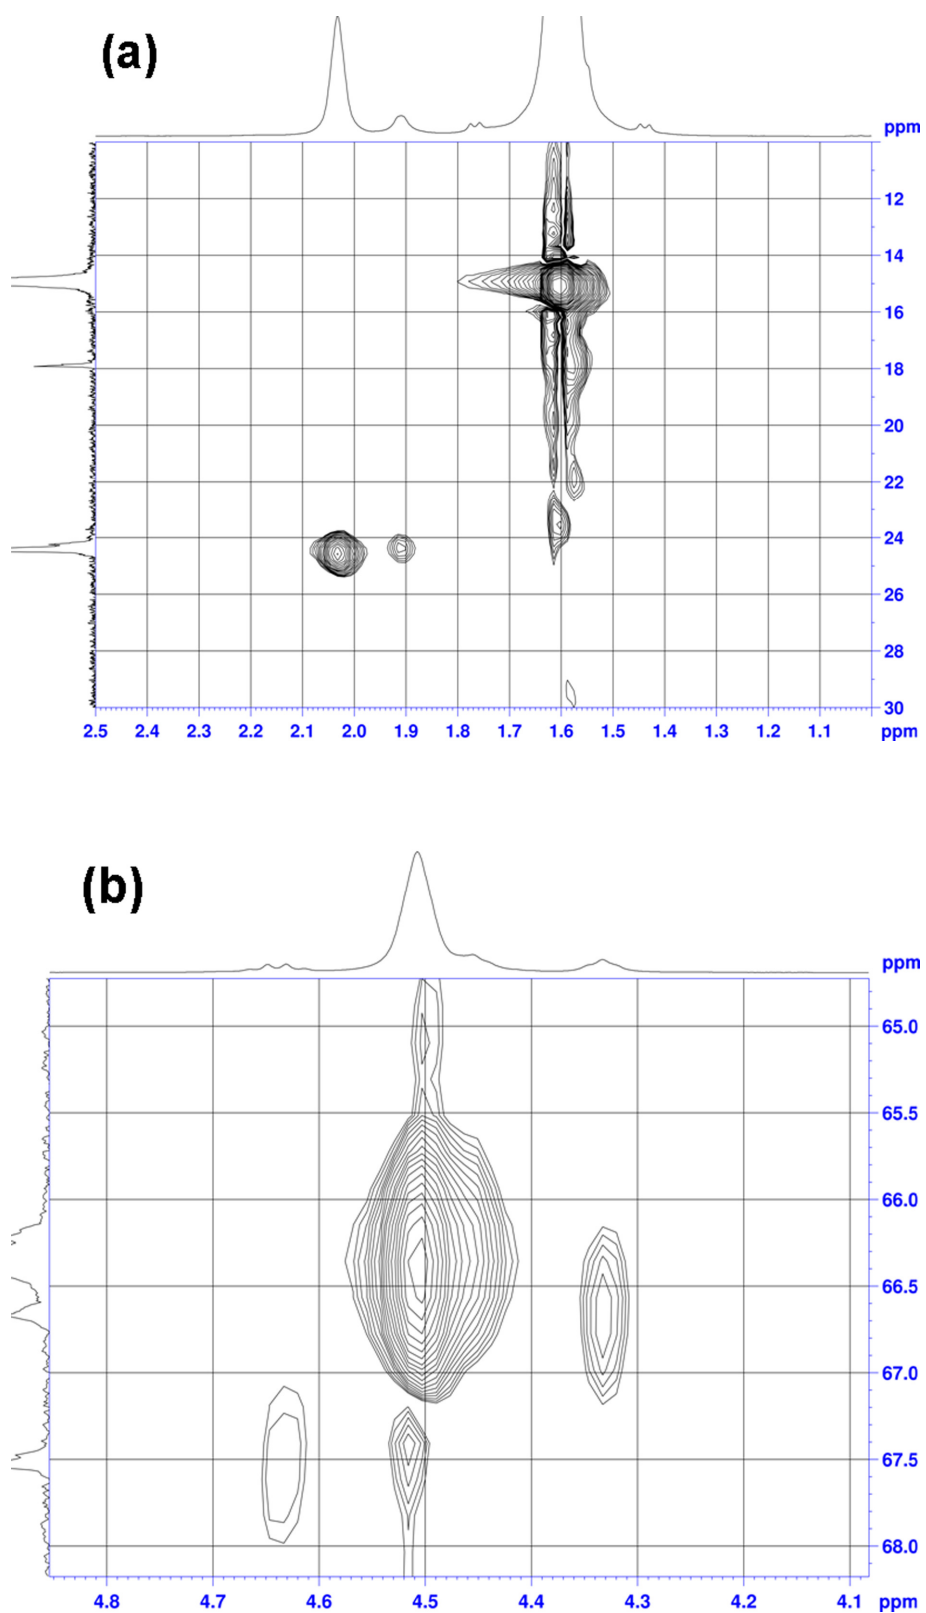

**Fig. S1  $^1\text{H}$ - $^{13}\text{C}$  HSQC NMR spectra of Copolymer 1 with particular regions enlarged.**

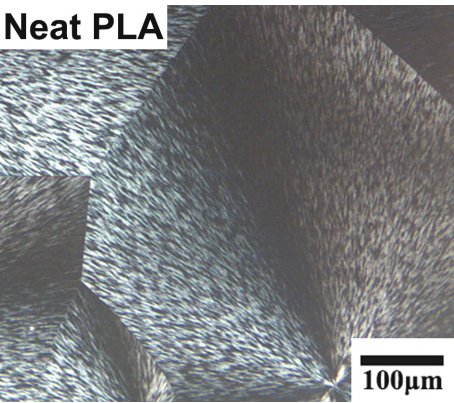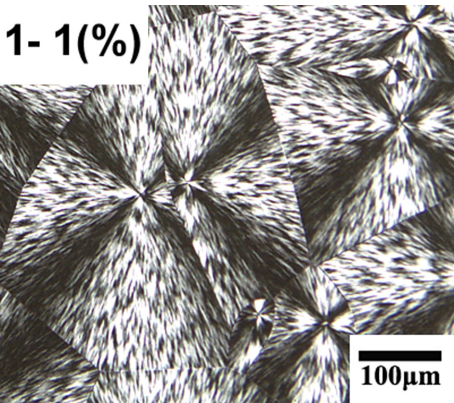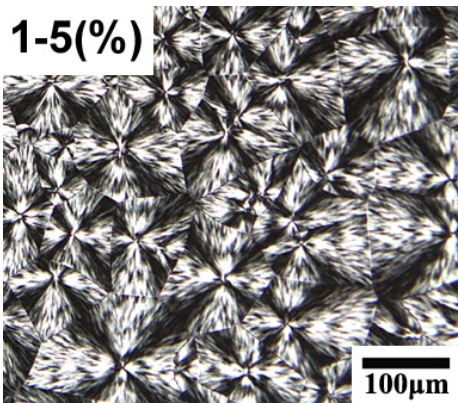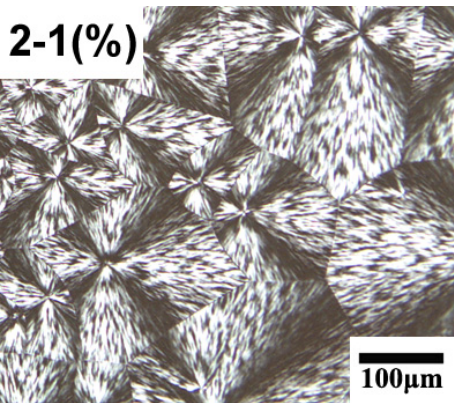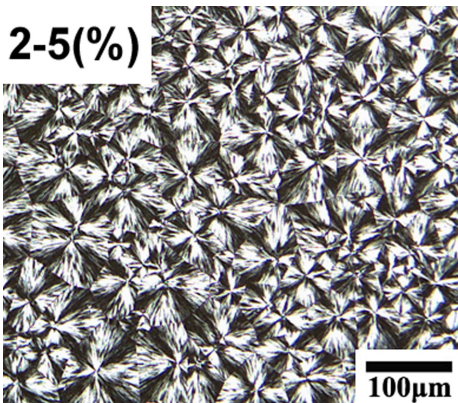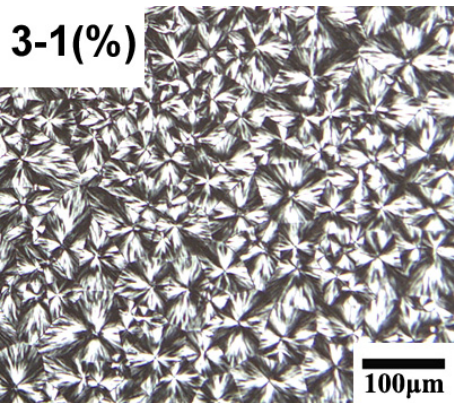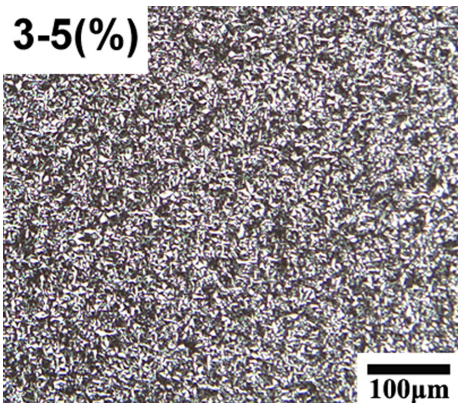



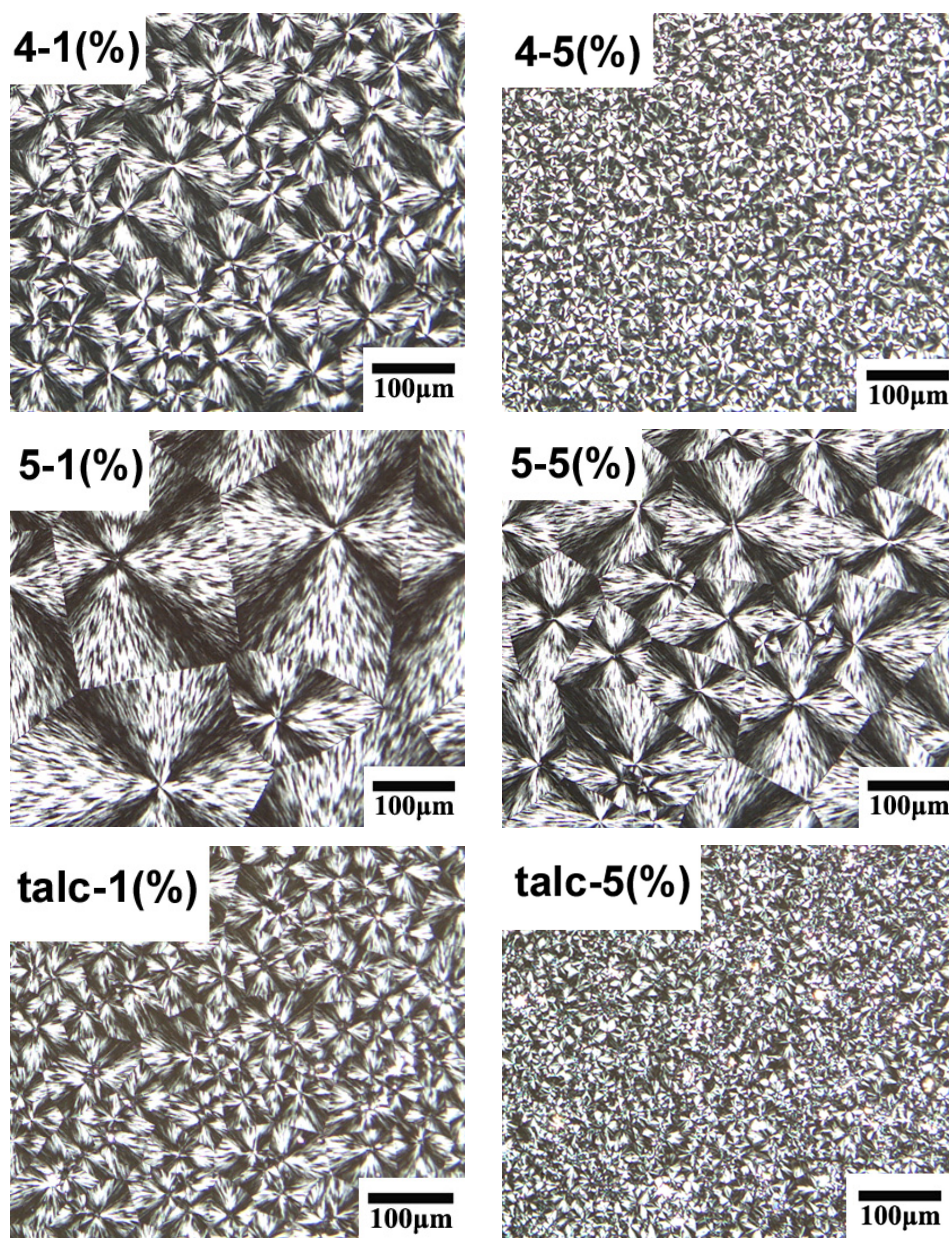

**Fig.S2 Polarized optical micrographs of neat PLA, PLA containing 1wt%, 5 wt% Copolymers 1-5 or talc crystallized at 122 °C after quenched from 180 °C.**

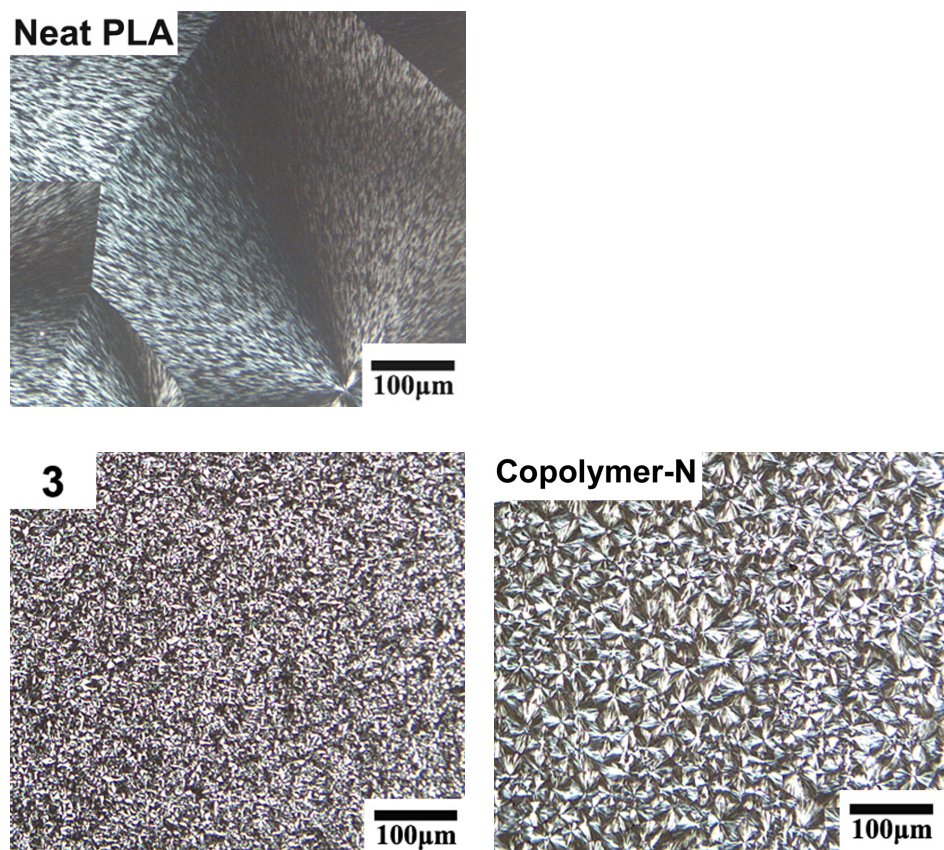

**Fig.S3 Polarized optical micrographs of neat PLA, PLA containing 5 wt% Copolymer 3 or Copolymer-N crystallized at 122 °C after quenched from 180 °C.**

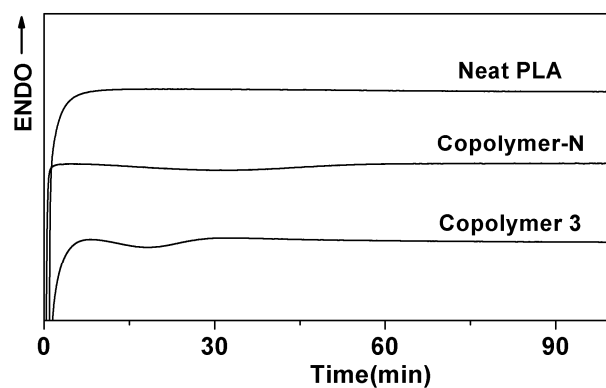

**Fig.S4 DSC curves during isothermal crystallization at 122 °C for neat PLA,  
PLA contain 5 wt% Copolymer 3 or Copolymer-N.**

Table S1. Chemical composition, molecular weight characteristics and thermal properties of PBT prepolymers and copolymers.

| Sample      | LA/BT(wt/wt) <sup>a</sup> | $M_n \times 10^{-3}$<br>kg mol <sup>-1</sup> | PDI <sup>b</sup> | $T_c^d$ (°C) | $T_m^d$ (°C) |
|-------------|---------------------------|----------------------------------------------|------------------|--------------|--------------|
| PBT         |                           | 1.6 <sup>b</sup>                             |                  | 193.0        | 210.6        |
| PBT-H       |                           | 3.0 <sup>b</sup>                             |                  | 200.5        | 215.8        |
| Copolymer 3 | 34:1                      | 19.8 <sup>c</sup>                            | 1.42             | 118.2        | 170.8        |
| Copolymer-N | 16:1                      | 23.3 <sup>c</sup>                            | 1.52             | 115.5        | 170.0        |

<sup>a</sup> Weight ratios of LA to BT in the copolymers calculated by <sup>1</sup>H-NMR;

<sup>b</sup> Number average molecular weight calculated by <sup>1</sup>H-NMR;

<sup>c</sup> Molecular weights and polydispersity indexes were measured by GPC with PS standards;

<sup>d</sup> The values of  $T_c$  and  $T_m$  were taken at the minima of the corresponding peaks.



Table S2. Kinetic parameters of isothermal crystallization for neat PLA and PLA blends containing 5 wt% copolymers at 122 °C

| Sample      | $t_0$ (min) | $t_{1/2}$ (min) | $\log k$ | $n$  |
|-------------|-------------|-----------------|----------|------|
| Neat PLA    | 25.20       | 109.91          | -4.42    | 2.21 |
| Copolymer 3 | 9.07        | 19.18           | -2.37    | 2.20 |
| Copolymer-N | 7.93        | 33.45           | -3.06    | 2.07 |
